# Supplementary material for: pH-dependent assembly of two polyoxometalate host–guest structural isomers based on Keggin polyoxoanion templates
Source: Royal Society of Chemistry journal article supplement (doi:10.1039/c4dt02050b), 2014-08-28
Supplement: c4dt02050b1.pdf [file c4dt02050b1.pdf]

Electronic Supplementary Information for

**pH-dependent assembly of two polyoxometalate host-guest structural isomers based on keggin polyoxoanion templates**

Lei Zhang,<sup>a,b</sup> Wenbin Yang,<sup>a</sup> Xiaofei Kuang,<sup>a</sup> Xiaoyuan Wu,<sup>a</sup> and Canzhong Lu<sup>\*a</sup>

<sup>a</sup>State Key Laboratory of Structural Chemistry, Fujian Institute of Research on the Structure of Matter, Chinese Academy of Sciences, Fuzhou, Fujian 350002, China. Fax: (+86)-591-83714946; Tel: (+86)-591-83705794; E-mail: czlu@fjirsm.ac.cn.

<sup>b</sup>University of Chinese Academy of Sciences, Beijing, 100049, China.

**Table S1.** Selected Bond Lengths (Å) and Angles (°) for compound **1**.

| Bond                                                                      | Distance   | Angle                                     | (°)        |
|---------------------------------------------------------------------------|------------|-------------------------------------------|------------|
| Ag1—N1                                                                    | 2.207 (11) | N1—Ag1—N2 <sup>i</sup>                    | 126.6 (4)  |
| Ag1—N2 <sup>i</sup>                                                       | 2.282 (11) | N1—Ag1—Cl1                                | 134.1 (3)  |
| Ag1—Cl1                                                                   | 2.495 (4)  | N2 <sup>i</sup> —Ag1—Cl1                  | 99.3 (3)   |
| Ag2—N7                                                                    | 2.168 (11) | N7—Ag2—N3                                 | 170.3 (5)  |
| Ag2—N3                                                                    | 2.171 (10) | N9—Ag3—N8 <sup>i</sup>                    | 121.3 (4)  |
| Ag3—N9                                                                    | 2.262 (11) | N9—Ag3—Cl1 <sup>ii</sup>                  | 135.1 (3)  |
| Ag3—N8 <sup>i</sup>                                                       | 2.385 (11) | N8 <sup>i</sup> —Ag3—Cl1 <sup>ii</sup>    | 92.9 (3)   |
| Ag3—Cl1 <sup>ii</sup>                                                     | 2.625 (4)  | N9—Ag3—Cl1 <sup>iii</sup>                 | 116.2 (4)  |
| Ag3—Cl1 <sup>iii</sup>                                                    | 2.869 (5)  | N8 <sup>i</sup> —Ag3—Cl1 <sup>iii</sup>   | 95.3 (3)   |
|                                                                           |            | Cl1 <sup>ii</sup> —Ag3—Cl1 <sup>iii</sup> | 85.33 (14) |
| Symmetry codes: (i) $x-1, y, z$ ; (ii) $x, y, z-1$ ; (iii) $-x, -y, -z$ . |            |                                           |            |

**Table S2.** Selected Bond Lengths (Å) and Angles (°) for compound **2**.

| Bond                  | Distance  | Angle                    | (°)       |
|-----------------------|-----------|--------------------------|-----------|
| Ag1—N1                | 2.169 (7) | N1—Ag1—N2 <sup>i</sup>   | 145.6 (3) |
| Ag1—N2 <sup>i</sup>   | 2.168 (8) | N1—Ag1—C11               | 112.0 (2) |
| Ag1—C11               | 2.689 (3) | N2 <sup>i</sup> —Ag1—C11 | 100.9 (2) |
| Ag2—N3                | 2.117 (7) | N3—Ag2—N7                | 172.6 (3) |
| Ag2—N7                | 2.127 (8) | N9—Ag3—C11 <sup>ii</sup> | 175.3 (2) |
| Ag3—N9                | 2.142 (7) |                          |           |
| Ag3—C11 <sup>ii</sup> | 2.348 (3) |                          |           |

Symmetry codes: (i)  $x, -y-1, z+1/2$ ; (ii)  $x-1/2, -y+1/2, z-1/2$ .

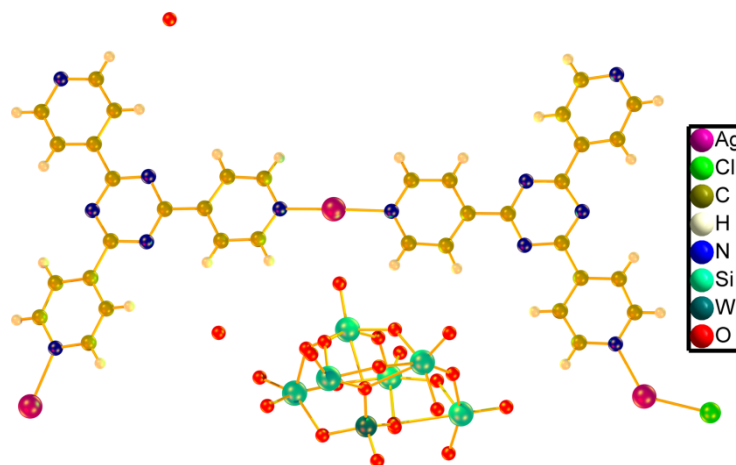

Fig. S1 The asymmetric units of compounds **1** and **2**.

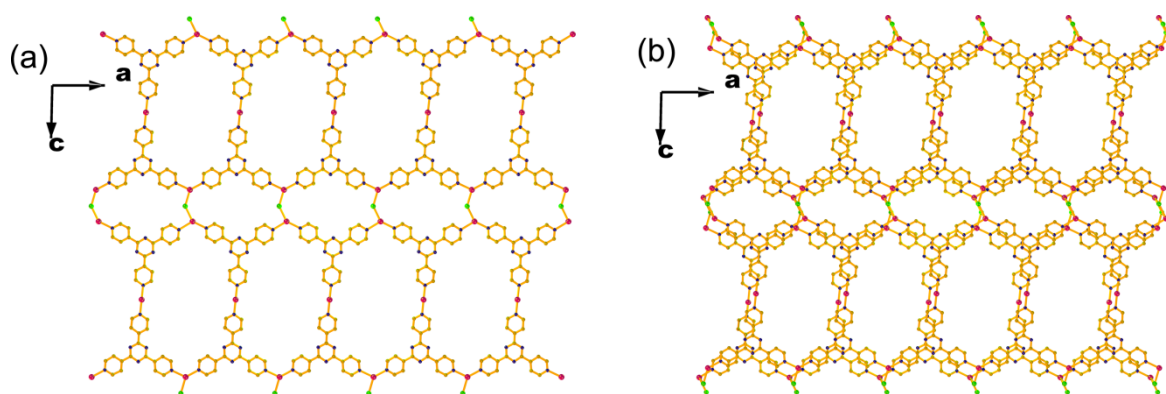

Fig. S2 The railway-shaped network in compound **1**.

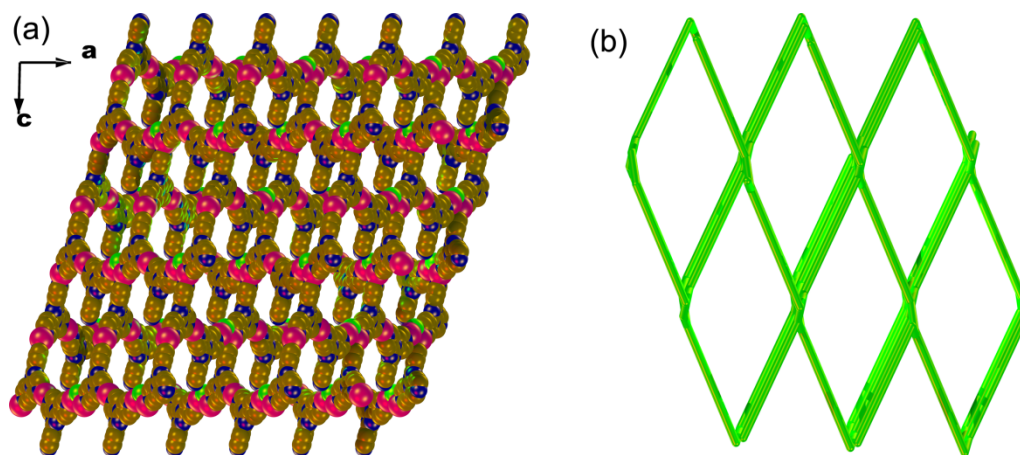

Fig. S3 (a) Views of the 3D host framework of compound **2** along the *b* direction. (b) The net topology of compound **2**.

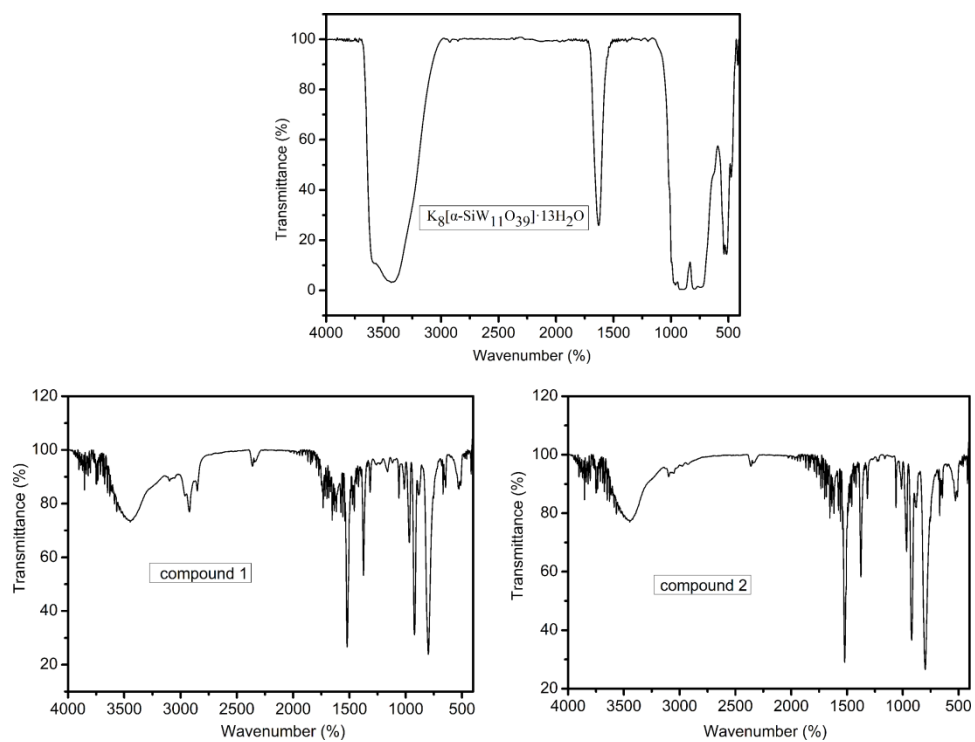

Fig. S4 The IR of  $\text{K}_8[\alpha\text{-SiW}_{11}\text{O}_{39}] \cdot 13\text{H}_2\text{O}$ , **1** and **2**.

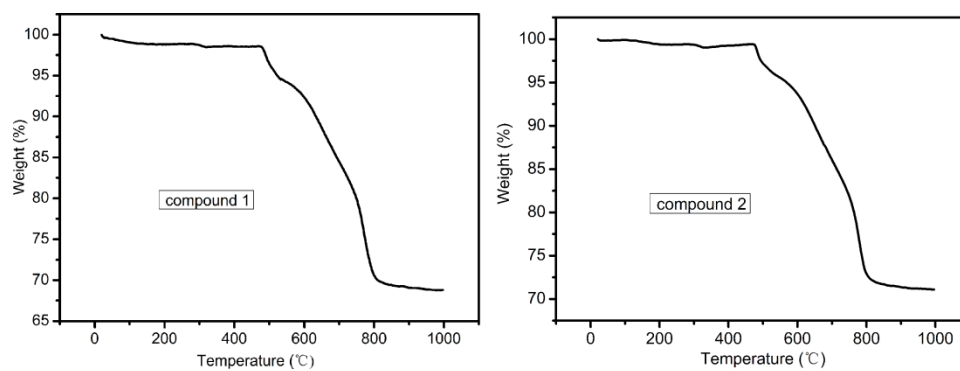

Fig. S5 The TG of compounds **1** and **2**.

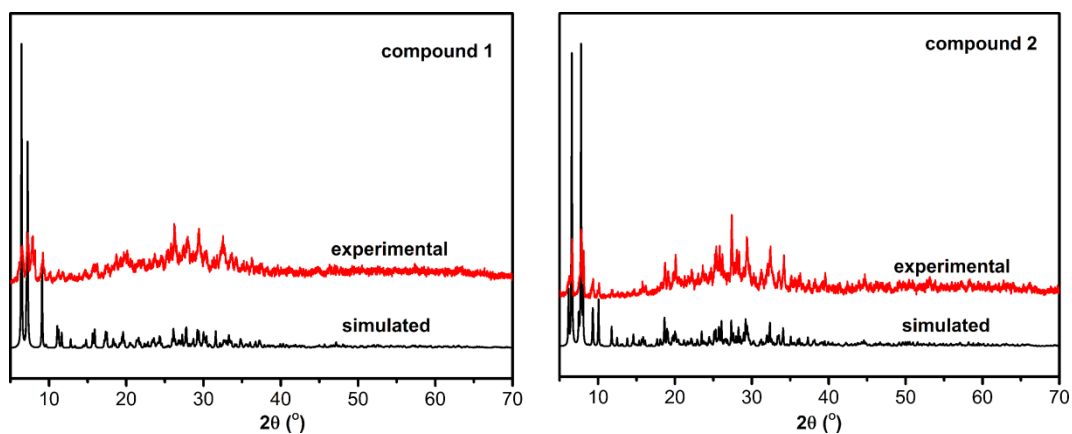

Fig.S6 The PXRD of compounds 1 and 2.

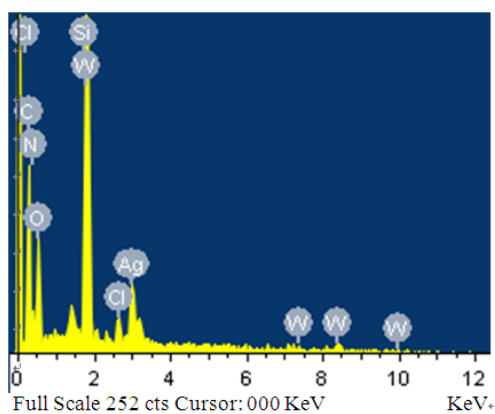

| Element | Weight (%) | Atomic (%) |
|---------|------------|------------|
| C K     | 27.21      | 42.77      |
| N K     | 19.16      | 25.83      |
| O K     | 23.56      | 27.81      |
| Si K    | -0.51      | -0.34      |
| Cl K    | 0.90       | 0.48       |
| Ag L    | 5.57       | 0.97       |
| W M     | 24.11      | 2.48       |
| Totals  | 100.00     |            |

Fig. S7 The EDS analysis of compound 1.

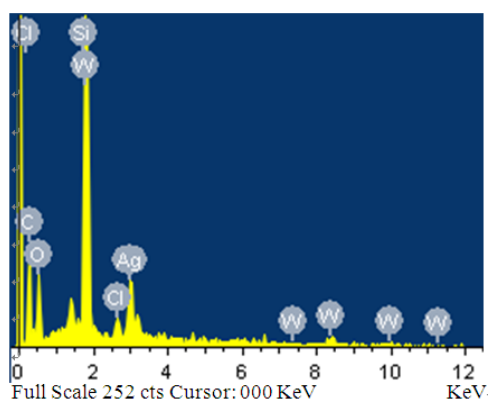

| Element | Weight (%) | Atomic (%) |
|---------|------------|------------|
| C K     | 27.66      | 58.06      |
| O K     | 21.61      | 34.05      |
| Si K    | -1.05      | -0.94      |
| Cl K    | 1.22       | 0.87       |
| Ag L    | 10.76      | 2.52       |
| W M     | 39.79      | 5.46       |
| Totals  | 100.00     |            |

Fig. S8 The EDS analysis of compound 2.
